# Supplementary material
Source: PubMed Central journal article supplement (PMC7456113)
Supplement: pnas.2007141117.sapp.pdf [file pnas.2007141117.sapp.pdf]

## SI Appendix

### A Baseline

| to/from | AMY  | CB   | INS  |
|---------|------|------|------|
| AMY     |      |      | 0.24 |
| CB      |      |      |      |
| INS     | 0.15 | 0.43 |      |

### B Neutral

| to/from | AMY   | CB    | INS |
|---------|-------|-------|-----|
| AMY     |       |       |     |
| CB      | 1.13  |       |     |
| INS     | -0.83 | -0.91 |     |

### B Emotional

| to/from | AMY | CB | INS   |
|---------|-----|----|-------|
| AMY     |     |    | -0.96 |
| CB      |     |    | -2.36 |
| INS     |     |    |       |

**Supplementary Table.** Extrinsic (between-region) effective connectivity and its modulatory parameters. BMA of the PEB group-level effective connectivity models afforded the A parameters representing baseline effective connectivity. BMA also yielded the modulatory B parameters during the processing of neutral knocking and modulatory B parameters during processing of emotional knocking. The units of these effective connection strengths (and modulatory changes) are reported in Hertz. This table only includes parameters related to extrinsic connectivity with a posterior probability at or above 95 %. AMY, amygdala; CB, cerebellar vermis; INS, insula.

**Supplementary Video.** An exemplary video of the point-light knocking stimuli.
